# Supplementary material for: The effects of dance intervention on clinical symptoms and cognitive deficits in hospitalized patients with chronic schizophrenia: a randomized controlled trial
Source: PeerJ journal article supplement (doi:10.7717/peerj.19840), 2025-08-21
Supplement: demographic_information.xlsx [file demographic_information.xlsx]

## Sheet: Sheet1
group	sex	age	education year	weight（kg）	height（cm）
1	1	53	12	56	163
1	1	46	16	76	164
1	1	54	9	70	161
1	1	38	15	60.5	160
1	2	31	6	57	162
1	2	49	12	75	165
1	2	45	16	64	172
1	2	56	12	68	169
1	1	49	12	42	152
1	1	57	9	60	162
1	1	54	12	58	156
1	2	54	9	68	170
1	1	49	9	56	154
1	1	50	12	54	158
1	2	47	3	73	171
1	2	58	12	73	173
1	1	53	12	56	152
1	2	57	12	70	163
2	1	32	6	78	155
2	2	56	6	65	161
2	2	49	13	80	170
2	2	50	12	75	175
2	1	34	9	77	162
2	1	61	12	62	160
2	1	50	9	77	160
2	2	52	12	48	165
2	2	58	12	50	173
2	2	57	12	46	164
2	2	58	12	72	172
2	2	55	12	59	165
2	2	51	6	55	160
2	1	51	12	65	156
