# Supplementary material for: The effects of dance intervention on clinical symptoms and cognitive deficits in hospitalized patients with chronic schizophrenia: a randomized controlled trial
Source: PeerJ journal article supplement (doi:10.7717/peerj.19840), 2025-08-21
Supplement: MCCB.xlsx [file MCCB.xlsx]

## Sheet: pre
group	TMT	TMT	TMT	TMT	SC	SC	SC	SC	HVLT-R	HVLT-R	HVLT-R	HVLT-R	SS	SS	SS	SS	DS	DS	DS	DS	NAB-Mazes	NAB-Mazes	NAB-Mazes	NAB-Mazes	BVMT-R	BVMT-R	BVMT-R	BVMT-R	CF	CF	CF	CF	MSCEIT-ME	MSCEIT-ME	MSCEIT-ME	MSCEIT-ME	CPT-IP	CPT-IP	CPT-IP	CPT-IP	MCCB	MCCB	MCCB	MCCB
1	38	0.11	82	73 - 91	15	< 0.1%	48	39 - 57	24	0.005	61	52 - 70	< 10	< 0.1%	< 20	44529	31	0.029	72	63 - 81	< 10	< 0.1%	22	13 - 31	23	0.003	59	50 - 68	27	0.011	66	57 - 75	23	0.003	59	50 - 68	18	< 0.1%	52	43 - 61	< 10	< 0.1%	< 20	44529
1	26	0.008	63	55 - 71	37	0.1	80	72 - 88	17	< 0.1%	51	43 - 59	48	0.42	98	90 - 106	46	0.34	94	86 - 102	26	0.008	64	56 - 72	27	0.011	65	57 - 73	25	0.006	62	54 - 70	38	0.11	82	74 - 90	34	0.05	77	69 - 85	14	< 0.1%	46	38 - 54
1	37	0.1	80	75 - 85	42	0.21	88	83 - 93	40	0.16	84	79 - 89	55	0.69	108	103 - 113	46	0.34	94	89 - 99	31	0.029	71	66 - 76	48	0.42	97	92 - 102	33	0.04	74	69 - 79	33	0.04	74	69 - 79	46	0.34	94	89 - 99	37	0.1	80	75 - 85
1	31	0.029	72	63 - 81	23	0.003	59	50 - 68	37	0.1	81	72 - 90	< 10	< 0.1%	24	15 - 33	31	0.029	72	63 - 81	22	0.003	59	50 - 68	16	< 0.1%	49	40 - 58	23	0.003	60	51 - 69	37	0.1	81	72 - 90	24	0.005	61	52 - 70	< 10	< 0.1%	32	23 - 41
1	42	0.21	87	83 - 91	49	0.46	98	94 - 102	55	0.69	108	104 - 112	44	0.27	91	87 - 95	37	0.1	81	77 - 85	53	0.62	105	101 - 109	53	0.62	104	100 - 108	47	0.38	96	92 - 100	33	0.04	74	70 - 78	44	0.27	92	88 - 96	44	0.27	91	87 - 95
1	43	0.24	90	85 - 95	47	0.38	95	90 - 100	38	0.11	82	77 - 87	48	0.42	97	92 - 102	46	0.34	94	89 - 99	49	0.46	99	94 - 104	53	0.62	104	99 - 109	56	0.73	108	103 - 113	58	0.79	112	107 - 117	48	0.42	97	92 - 102	48	0.42	97	92 - 102
1	45	0.31	92	87 - 97	44	0.27	91	86 - 96	44	0.27	91	86 - 96	46	0.34	93	88 - 98	49	0.46	99	94 - 104	22	0.003	58	53 - 63	36	0.08	79	74 - 84	54	0.66	106	101 - 111	43	0.24	90	85 - 95	41	0.18	86	81 - 91	35	0.07	77	72 - 82
1	32	0.036	74	65 - 83	21	0.002	56	47 - 65	62	0.89	118	109 - 127	20	0.001	56	47 - 65	63	0.9	119	110 - 128	13	< 0.1%	45	36 - 54	53	0.62	105	96 - 114	31	0.029	72	63 - 81	49	0.46	98	89 - 107	31	0.029	71	62 - 80	29	0.018	69	60 - 78
1	32	0.036	73	69 - 77	31	0.029	71	67 - 75	26	0.008	64	60 - 68	39	0.14	83	79 - 87	40	0.16	84	80 - 88	53	0.62	105	101 - 109	28	0.014	67	63 - 71	33	0.04	74	70 - 78	37	0.1	81	77 - 85	28	0.014	66	62 - 70	27	0.011	65	61 - 69
1	40	0.16	86	77 - 95	22	0.003	58	49 - 67	< 10	< 0.1%	34	25 - 43	21	0.002	57	48 - 66	29	0.018	69	60 - 78	< 10	< 0.1%	23	14 - 32	< 10	< 0.1%	37	28 - 46	36	0.08	79	70 - 88	59	0.82	114	105 - 123	< 10	< 0.1%	37	28 - 46	< 10	< 0.1%	< 20	44529
1	32	0.036	74	69 - 79	32	0.036	73	68 - 78	14	< 0.1%	46	41 - 51	34	0.05	76	71 - 81	38	0.11	82	77 - 87	22	0.003	58	53 - 63	31	0.029	71	66 - 76	30	0.023	70	65 - 75	38	0.11	82	77 - 87	38	0.11	82	77 - 87	18	< 0.1%	52	47 - 57
1	38	0.11	81	72 - 90	21	0.002	56	47 - 65	43	0.24	89	80 - 98	< 10	< 0.1%	32	23 - 41	37	0.1	81	72 - 90	13	< 0.1%	45	36 - 54	33	0.04	74	65 - 83	25	0.006	63	54 - 72	43	0.24	90	81 - 99	23	0.003	60	51 - 69	11	< 0.1%	41	32 - 50
1	25	0.006	63	58 - 68					28	0.014	67	62 - 72	18	< 0.1%	52	47 - 57	28	0.014	67	62 - 72	21	0.002	56	51 - 61	28	0.014	67	62 - 72	33	0.04	74	69 - 79					35	0.07	78	73 - 83
1	38	0.11	82	73 - 91	30	0.023	69	60 - 78	32	0.036	73	64 - 82	36	0.08	79	70 - 88	37	0.1	81	72 - 90	13	< 0.1%	45	36 - 54	36	0.08	79	70 - 88	50	0.5	99	90 - 108	62	0.89	117	108 - 126	25	0.006	62	53 - 71	22	0.003	58	49 - 67
1	30	0.023	71	62 - 80	32	0.036	74	65 - 83	23	0.003	59	50 - 68	29	0.018	69	60 - 78	27	0.011	66	57 - 75	50	0.5	100	91 - 109	46	0.34	94	85 - 103	14	< 0.1%	45	36 - 54	31	0.029	71	62 - 80	31	0.029	71	62 - 80	< 10	< 0.1%	39	30 - 48
1	23	0.003	60	52 - 68	27	0.011	66	58 - 74	43	0.24	90	82 - 98	26	0.008	65	57 - 73	43	0.24	90	82 - 98	< 10	< 0.1%	24	16 - 32	34	0.05	75	67 - 83	28	0.014	67	59 - 75	49	0.46	98	90 - 106	29	0.018	69	61 - 77	13	< 0.1%	45	37 - 53
1	-1.5	14	1	0.08	-1.83	17	2	-0.17	-2.12	1	46	0.34	94	85 - 103	28	0.014	68	59 - 77	58	0.79	112	103 - 121	52	0.58	103	94 - 112	63	0.9	119	110 - 128	47	0.38	95	86 - 104	48	0.42	97	88 - 106	38	0.11	81	72 - 90	61	0.86
1	-1.83	20	3	-0.43	-1.83	26	6	-1.11	-1.5	1	34	0.05	75	71 - 79	36	0.08	79	75 - 83					32	0.036	72	68 - 76					33	0.04	74	70 - 78	34	0.05	76	72 - 80	19	< 0.1%	53	49 - 57	46	0.34
2	41	0.18	87	82 - 92	41	0.18	86	81 - 91	30	0.023	70	65 - 75	38	0.11	82	77 - 87	39	0.14	84	79 - 89	51	0.54	102	97 - 107	30	0.023	70	65 - 75	43	0.24	89	84 - 94	29	0.018	69	64 - 74	51	0.54	102	97 - 107	34	0.05	75	70 - 80
2	48	0.42	97	88 - 106	35	0.07	78	69 - 87	29	0.018	68	59 - 77	29	0.018	69	60 - 78	42	0.21	88	79 - 97	24	0.005	61	52 - 70	37	0.1	80	71 - 89	32	0.036	74	65 - 83	37	0.1	80	71 - 89
2	22	0.003	57	48 - 66	15	< 0.1%	48	39 - 57	21	0.002	56	47 - 65	29	0.018	69	60 - 78	22	0.003	57	48 - 66	18	< 0.1%	51	42 - 60	22	0.003	59	50 - 68	< 10	< 0.1%	29	20 - 38	41	0.18	87	78 - 96	24	0.005	61	52 - 70	< 10	< 0.1%	< 20	44529
2	29	0.018	69	60 - 78	31	0.029	71	62 - 80	31	0.029	72	63 - 81	35	0.07	78	69 - 87	30	0.023	70	61 - 79	33	0.04	74	65 - 83	30	0.023	71	62 - 80	30	0.023	71	62 - 80	26	0.008	64	55 - 73	40	0.16	85	76 - 94	< 10	< 0.1%	34	25 - 43
2	32	0.036	73	64 - 82	43	0.24	89	80 - 98	39	0.14	84	75 - 93	41	0.18	87	78 - 96	24	0.005	62	53 - 71	29	0.018	68	59 - 77	45	0.31	92	83 - 101	37	0.1	80	71 - 89	56	0.73	110	101 - 119	47	0.38	95	86 - 104	25	0.006	63	54 - 72
2	24	0.005	61	52 - 70	12	< 0.1%	43	34 - 52	45	0.31	93	84 - 102	29	0.018	69	60 - 78	27	0.011	66	57 - 75	36	0.08	80	71 - 89	40	0.16	84	75 - 93	< 10	< 0.1%	39	30 - 48	23	0.003	60	51 - 69	16	< 0.1%	49	40 - 58	< 10	< 0.1%	30	21 - 39
2	19	< 0.1%	54	45 - 63	31	0.029	71	62 - 80	21	0.002	56	47 - 65	41	0.18	87	78 - 96	33	0.04	75	66 - 84	53	0.62	105	96 - 114	28	0.014	67	58 - 76	16	< 0.1%	48	39 - 57	30	0.023	70	61 - 79	34	0.05	76	67 - 85	< 10	< 0.1%	39	30 - 48
2	37	0.1	80	76 - 84	39	0.14	83	79 - 87	35	0.07	77	73 - 81	29	0.018	69	65 - 73	28	0.014	68	64 - 72	43	0.24	89	85 - 93	25	0.006	62	58 - 66	35	0.07	78	74 - 82	34	0.05	75	71 - 79	47	0.38	96	92 - 100	28	0.014	67	63 - 71
2	16	< 0.1%	49	40 - 58	16	< 0.1%	50	41 - 59	31	0.029	72	63 - 81	35	0.07	78	69 - 87	42	0.21	88	79 - 97	18	< 0.1%	51	42 - 60	28	0.014	67	58 - 76	20	0.001	55	46 - 64	45	0.31	92	83 - 101	42	0.21	88	79 - 97	10	< 0.1%	40	31 - 49
2	34	0.05	76	71 - 81	25	0.006	63	58 - 68	42	0.21	87	82 - 92	30	0.023	70	65 - 75	38	0.11	82	77 - 87	21	0.002	56	51 - 61	31	0.029	72	67 - 77	36	0.08	79	74 - 84	24	0.005	61	56 - 66	32	0.036	74	69 - 79	22	0.003	58	53 - 63
2	51	0.54	102	93 - 111	27	0.011	66	57 - 75	21	0.002	56	47 - 65	41	0.18	86	77 - 95	28	0.014	66	57 - 75	38	0.11	82	73 - 91	42	0.21	88	79 - 97	32	0.036	73	64 - 82	46	0.34	93	84 - 102	34	0.05	77	68 - 86	22	0.003	58	49 - 67
2	31	0.029	72	63 - 81	< 10	< 0.1%	38	29 - 47	45	0.31	92	83 - 101	< 10	< 0.1%	24	15 - 33	25	0.006	62	53 - 71	< 10	< 0.1%	22	13 - 31	24	0.005	62	53 - 71	25	0.006	63	54 - 72	40	0.16	85	76 - 94	25	0.006	63	54 - 72	< 10	< 0.1%	32	23 - 41
2	40	0.16	84	79 - 89	36	0.08	79	74 - 84	38	0.11	82	77 - 87	13	< 0.1%	45	40 - 50	38	0.11	82	77 - 87	49	0.46	99	94 - 104	22	0.003	58	53 - 63	39	0.14	83	78 - 88	44	0.27	91	86 - 96	47	0.38	96	91 - 101	32	0.036	74	69 - 79
2	38	0.11	83	78 - 88	45	0.31	93	88 - 98	42	0.21	87	82 - 92	58	0.79	112	107 - 117	47	0.38	96	91 - 101	47	0.38	96	91 - 101	53	0.62	104	99 - 109	47	0.38	96	91 - 101	51	0.54	101	96 - 106	49	0.46	98	93 - 103	47	0.38	96	91 - 101

## Sheet: post
group	TMT	TMT	TMT	TMT	SC	SC	SC	SC	HVLT-R	HVLT-R	HVLT-R	HVLT-R	SS	SS	SS	SS	DS	DS	DS	DS	NAB-Mazes	NAB-Mazes	NAB-Mazes	NAB-Mazes	BVMT-R	BVMT-R	BVMT-R	BVMT-R	CF	CF	CF	CF	MSCEIT-ME	MSCEIT-ME	MSCEIT-ME	MSCEIT-ME	CPT-IP	CPT-IP	CPT-IP	CPT-IP	MCCB	MCCB	MCCB	MCCB
1	26	0.008	64	60 - 68	19	< 0.1%	53	49 - 57	< 0	< 0.1%	20	16 - 24	2	< 0.1%	27	23 - 31	29	0.018	69	65 - 73	< 0	< 0.1%	< 0	-8	26	0.008	65	61 - 69	27	0.011	65	61 - 69	4	< 0.1%	32	28 - 36	12	< 0.1%	42	38 - 46	< 0	< 0.1%	8	44298
1	24	0.005	62	58 - 66	38	0.11	83	79 - 87	6	< 0.1%	34	30 - 38	47	0.38	95	91 - 99	49	0.46	99	95 - 103	< 0	< 0.1%	10	44361	26	0.008	64	60 - 68	17	< 0.1%	50	46 - 54	24	0.005	61	57 - 65	29	0.018	68	64 - 72	5	< 0.1%	32	28 - 36
1	19	< 0.1%	54	50 - 58	22	0.003	58	54 - 62	17	< 0.1%	50	46 - 54	47	0.38	95	91 - 99	30	0.023	70	66 - 74	< 0	< 0.1%	< 0	-8	41	0.18	87	83 - 91	22	0.003	59	55 - 63	14	< 0.1%	46	42 - 50	26	0.008	64	60 - 68	6	< 0.1%	35	31 - 39
1	19	< 0.1%	54	50 - 58	26	0.008	64	60 - 68	16	< 0.1%	49	45 - 53	19	< 0.1%	53	49 - 57	29	0.018	69	65 - 73	4	< 0.1%	31	27 - 35	20	0.001	54	50 - 58	23	0.003	59	55 - 63	19	< 0.1%	53	49 - 57	18	< 0.1%	52	48 - 56	< 0	< 0.1%	22	18 - 26
1	24	0.005	61	57 - 65	28	0.014	67	63 - 71	33	0.04	75	71 - 79	29	0.018	69	65 - 73	21	0.002	57	53 - 61	30	0.023	70	66 - 74	47	0.38	95	91 - 99	38	0.11	82	78 - 86	12	< 0.1%	43	39 - 47	25	0.006	62	58 - 66	18	< 0.1%	51	47 - 55
1	26	0.008	64	60 - 68	28	0.014	67	63 - 71	14	< 0.1%	46	42 - 50	37	0.1	80	76 - 84	30	0.023	70	66 - 74	7	< 0.1%	36	32 - 40	48	0.42	97	93 - 101	48	0.42	97	93 - 101	34	0.05	76	72 - 80	29	0.018	69	65 - 73	17	< 0.1%	50	46 - 54
1	31	0.029	71	67 - 75	27	0.011	65	61 - 69	24	0.005	61	57 - 65	33	0.04	75	71 - 79	34	0.05	77	73 - 81	< 0	< 0.1%	< 0	-8	21	0.002	56	52 - 60	43	0.24	89	85 - 93	21	0.002	56	52 - 60	23	0.003	59	55 - 63	6	< 0.1%	35	31 - 39
1	21	0.002	57	53 - 61	20	0.001	54	50 - 58	50	0.5	100	96 - 104	33	0.04	75	71 - 79	55	0.69	108	104 - 112	< 0	< 0.1%	< 0	-8	54	0.66	105	101 - 109	32	0.036	72	68 - 76	31	0.029	71	67 - 75	25	0.006	63	59 - 67	19	< 0.1%	54	50 - 58
1	18	< 0.1%	53	49 - 57	1	< 0.1%	26	22 - 30	< 0	< 0.1%	10	44361	23	0.003	60	56 - 64	24	0.005	61	57 - 65	24	0.005	62	58 - 66	14	< 0.1%	47	43 - 51	28	0.014	67	63 - 71	17	< 0.1%	51	47 - 55	3	< 0.1%	30	26 - 34	< 0	< 0.1%	14	44487
1	32	0.036	73	69 - 77	29	0.018	69	65 - 73	9	< 0.1%	39	35 - 43	37	0.1	80	76 - 84	25	0.006	62	58 - 66	< 0	< 0.1%	7	44266	30	0.023	70	66 - 74	33	0.04	75	71 - 79	41	0.18	87	83 - 91	18	< 0.1%	51	47 - 55	8	< 0.1%	37	33 - 41
1	18	< 0.1%	51	47 - 55	12	< 0.1%	43	39 - 47	< 0	< 0.1%	15	44519	17	< 0.1%	50	46 - 54	19	< 0.1%	54	50 - 58	< 0	< 0.1%	< 0	-8	14	< 0.1%	46	42 - 50	22	0.003	59	55 - 63	15	< 0.1%	48	44 - 52	20	0.001	55	51 - 59	< 0	< 0.1%	10	44361
1	26	0.008	64	60 - 68	20	0.001	54	50 - 58	21	0.002	57	53 - 61	23	0.003	60	56 - 64	35	0.07	77	73 - 81	< 0	< 0.1%	< 0	-8	32	0.036	73	69 - 77	26	0.008	64	60 - 68	26	0.008	63	59 - 67	18	< 0.1%	52	48 - 56	4	< 0.1%	31	27 - 35
1	27	0.011	65	61 - 69	28	0.014	67	63 - 71	4	< 0.1%	31	27 - 35	43	0.24	90	86 - 94	35	0.07	77	73 - 81	< 0	< 0.1%	< 0	-8	36	0.08	79	75 - 83	48	0.42	97	93 - 101	44	0.27	91	87 - 95	19	< 0.1%	53	49 - 57	11	< 0.1%	42	38 - 46
1	26	0.008	64	60 - 68	32	0.036	73	69 - 77	6	< 0.1%	34	30 - 38	27	0.011	65	61 - 69	33	0.04	74	70 - 78	32	0.036	74	70 - 78	46	0.34	95	91 - 99	24	0.005	61	57 - 65	17	< 0.1%	51	47 - 55	24	0.005	62	58 - 66	12	< 0.1%	42	38 - 46
1	17	< 0.1%	51	47 - 55	23	0.003	59	55 - 63	30	0.023	70	66 - 74	30	0.023	71	67 - 75	39	0.14	84	80 - 88	< 0	< 0.1%	< 0	-8	38	0.11	82	78 - 86	31	0.029	71	67 - 75	33	0.04	74	70 - 78	35	0.07	77	73 - 81	13	< 0.1%	45	41 - 49
1	116	107 - 125	41	0.18	86	77 - 95	49	0.46	98	89 - 107	34	0.05	76	72 - 80	27	0.011	65	61 - 69	44	0.27	91	87 - 95	53	0.62	105	101 - 109	55	0.69	108	104 - 112	28	0.014	67	63 - 71	48	0.42	97	93 - 101	37	0.1	81	77 - 85	43	0.24
1	86	81 - 91	42	0.21	88	83 - 93	48	0.42	97	92 - 102	32	0.036	73	69 - 77	27	0.011	65	61 - 69	42	0.21	89	85 - 93	47	0.38	95	91 - 99	64	0.92	120	116 - 124	< 0	< 0.1%	19	15 - 23	52	0.58	103	99 - 107	27	0.011	65	61 - 69	26	0.008
1	27	0.011	65	61 - 69	21	0.002	57	53 - 61	2	< 0.1%	29	25 - 33	23	0.003	60	56 - 64	20	0.001	55	51 - 59	20	0.001	55	51 - 59	18	< 0.1%	52	48 - 56	33	0.04	75	71 - 79	12	< 0.1%	42	38 - 46	33	0.04	75	71 - 79	2	< 0.1%	28	24 - 32
2	20	0.001	55	51 - 59	20	0.001	54	50 - 58	4	< 0.1%	31	27 - 35	27	0.011	65	61 - 69	27	0.011	66	62 - 70	< 0	< 0.1%	< 0	-8	14	< 0.1%	47	43 - 51	15	< 0.1%	48	44 - 52	26	0.008	64	60 - 68	17	< 0.1%	51	47 - 55	< 0	< 0.1%	17	13 - 21
2	25	0.006	63	59 - 67	31	0.029	72	68 - 76	17	< 0.1%	50	46 - 54	33	0.04	75	71 - 79	35	0.07	78	74 - 82	1	< 0.1%	27	23 - 31	25	0.006	63	59 - 67	39	0.14	83	79 - 87	13	< 0.1%	45	41 - 49	34	0.05	75	71 - 79	6	< 0.1%	34	30 - 38
2	27	0.011	66	62 - 70	40	0.16	84	80 - 88	27	0.011	65	61 - 69	40	0.16	85	81 - 89	30	0.023	70	66 - 74	< 0	< 0.1%	16	44550	45	0.31	92	88 - 96	44	0.27	92	88 - 96	39	0.14	83	79 - 87	40	0.16	85	81 - 89	22	0.003	58	54 - 62
2	24	0.005	62	58 - 66	18	< 0.1%	52	48 - 56	34	0.05	76	72 - 80	27	0.011	65	61 - 69	33	0.04	74	70 - 78	16	< 0.1%	49	45 - 53	40	0.16	85	81 - 89	21	0.002	56	52 - 60	11	< 0.1%	41	37 - 45	10	< 0.1%	40	36 - 44	7	< 0.1%	35	31 - 39
2	21	0.002	57	53 - 61	32	0.036	73	69 - 77	2	< 0.1%	29	25 - 33	40	0.16	85	81 - 89	40	0.16	84	80 - 88	42	0.21	88	84 - 92	25	0.006	62	58 - 66	26	0.008	64	60 - 68	17	< 0.1%	50	46 - 54	28	0.014	67	63 - 71	11	< 0.1%	41	37 - 45
2	21	0.002	57	53 - 61	11	< 0.1%	42	38 - 46	1	< 0.1%	27	23 - 31	10	< 0.1%	40	36 - 44	11	< 0.1%	41	37 - 45	3	< 0.1%	29	25 - 33	11	< 0.1%	41	37 - 45	30	0.023	70	66 - 74	14	< 0.1%	46	42 - 50	28	0.014	67	63 - 71	< 0	< 0.1%	13	44456
2	19	< 0.1%	54	50 - 58	21	0.002	57	53 - 61	16	< 0.1%	48	44 - 52	33	0.04	75	71 - 79	46	0.34	93	89 - 97	< 0	< 0.1%	5	44205	25	0.006	62	58 - 66	30	0.023	70	66 - 74	29	0.018	68	64 - 72	35	0.07	78	74 - 82	7	< 0.1%	35	31 - 39
2	20	0.001	54	50 - 58	1	< 0.1%	27	23 - 31	18	< 0.1%	52	48 - 56	13	< 0.1%	45	41 - 49	17	< 0.1%	51	47 - 55	< 0	< 0.1%	< 0	-8	20	0.001	54	50 - 58	26	0.008	64	60 - 68	8	< 0.1%	36	32 - 40	8	< 0.1%	37	33 - 41	< 0	< 0.1%	10	44361
2	39	0.14	84	80 - 88	40	0.16	84	80 - 88	24	0.005	61	57 - 65	47	0.38	95	91 - 99	43	0.24	89	85 - 93	27	0.011	65	61 - 69	50	0.5	100	96 - 104	39	0.14	83	79 - 87	38	0.11	81	77 - 85	39	0.14	83	79 - 87	30	0.023	70	66 - 74
2	18	< 0.1%	52	48 - 56	10	< 0.1%	40	36 - 44	< 0	< 0.1%	14	44487	3	< 0.1%	30	26 - 34	15	< 0.1%	48	44 - 52	< 0	< 0.1%	< 0	-8	18	< 0.1%	52	48 - 56	39	0.14	83	79 - 87					17	< 0.1%	50	46 - 54
2	20	0.001	55	51 - 59	8	< 0.1%	37	33 - 41	24	0.005	61	57 - 65	20	0.001	55	51 - 59	24	0.005	61	57 - 65	< 0	< 0.1%	< 0	-8	23	0.003	60	56 - 64	26	0.008	64	60 - 68	22	0.003	59	55 - 63	20	0.001	55	51 - 59	0	< 0.1%	25	21 - 29
2	11	< 0.1%	41	37 - 45	0	< 0.1%	25	21 - 29	2	< 0.1%	29	25 - 33	10	< 0.1%	40	36 - 44	15	< 0.1%	47	43 - 51	< 0	< 0.1%	< 0	-8	18	< 0.1%	52	48 - 56	21	0.002	56	52 - 60					3	< 0.1%	30	26 - 34
2	26	0.008	63	59 - 67	22	0.003	58	54 - 62	13	< 0.1%	44	40 - 48	< 0	< 0.1%	20	16 - 24	30	0.023	70	66 - 74	9	< 0.1%	38	34 - 42	11	< 0.1%	41	37 - 45	30	0.023	70	66 - 74	24	0.005	62	58 - 66	34	0.05	76	72 - 80	0	< 0.1%	25	21 - 29
2	24	0.005	60	56 - 64	27	0.011	65	61 - 69	18	< 0.1%	52	48 - 56	50	0.5	100	96 - 104	35	0.07	78	74 - 82	10	< 0.1%	41	37 - 45	50	0.5	100	96 - 104	39	0.14	83	79 - 87	29	0.018	68	64 - 72	30	0.023	70	66 - 74	18	< 0.1%	53	49 - 57
