# Supplementary material for: The effects of dance intervention on clinical symptoms and cognitive deficits in hospitalized patients with chronic schizophrenia: a randomized controlled trial
Source: PeerJ journal article supplement (doi:10.7717/peerj.19840), 2025-08-21
Supplement: PANSS.xlsx [file PANSS.xlsx]

## Sheet: pre
group	sex	PANSS-T_pre	PANSS-P_pre	PANSS-N_pre
1	2	28	10	18
1	2	34	10	24
1	2	26	7	19
1	2	17	7	10
1	1	37	14	23
1	1	28	9	19
1	1	34	13	21
1	1	40	9	31
1	2	32	10	22
1	2	38	17	21
1	2	32	7	25
1	1	31	12	19
1	2	29	7	22
1	2	32	7	25
1	1	34	7	27
1	1	29	7	22
1	2	37	7	30
1	1	31	7	24
2	2	27	7	20
2	1	40	11	29
2	1	33	9	24
2	1	35	9	26
2	2	15	7	8
2	2	39	10	29
2	1	31	7	24
2	1	33	9	24
2	1	36	7	29
2	1	33	13	20
2	1	39	10	29
2	1	29	7	22
2	1	35	7	28
2	2	36	7	29

## Sheet: post
group	sex	PANSS-T_post	PANSS-P_post	PANSS-N_post
1	2	28	10	18
1	2	24	7	17
1	2	22	7	15
1	2	16	7	9
1	1	39	16	23
1	1	27	9	18
1	1	34	13	21
1	1	40	9	31
1	2	33	11	22
1	2	38	17	21
1	2	21	7	14
1	1	31	12	19
1	2	29	7	22
1	2	32	7	25
1	1	24	7	27
1	1	26	7	19
1	2	31	7	24
1	1	26	7	19
2	2	27	7	20
2	1	40	11	29
2	1	33	9	24
2	1	21	7	14
2	2	15	7	8
2	2	34	10	24
2	1	31	7	24
2	1	21	7	14
2	1	31	7	24
2	1	33	13	20
2	1	36	10	26
2	1	24	7	17
2	1	35	7	28
2	2	36	7	29
