# Supplementary material for: The effects of dance intervention on clinical symptoms and cognitive deficits in hospitalized patients with chronic schizophrenia: a randomized controlled trial
Source: PeerJ journal article supplement (doi:10.7717/peerj.19840), 2025-08-21
Supplement: physiology_indicators.xlsx [file physiology_indicators.xlsx]

## Sheet: Sheet1
group	Whole bloodWBC	Whole bloodNEU#	Whole bloodLYM#	Whole bloodMON#	Whole bloodEOS#	Whole bloodBAS#	Whole bloodNEU%	Whole bloodLYM%	Whole bloodMON%	Whole bloodEOS%	Whole bloodBAS%	Whole bloodRBC	Whole bloodHGB	Whole bloodHCT	Whole bloodMCV	Whole bloodMCH	Whole bloodMCHC	Whole bloodRDW-CV	Whole bloodRDW-SD	Whole bloodPLT	Whole bloodMPV	Whole bloodPDW	Whole bloodPCT	SerumGLU	SerumBUN	SerumCREA	SerumURIC	SerumB2MG	SerumCYS-C	SerumTBIL	SerumDBIL	SerumIBIL	SerumTP	SerumALB	SerumGLB	SerumA/G	SerumALT	SerumAST-1	SerumGGT	SerumALP	SerumLDH	SerumADA	Serum5NT	SerumCHE	SerumTBA	SerumCG	SerumMAO	SerumCHOL	SerumTG
1	1.19	0.75	0.37	0.11	-0.03	-0.01	1.2	-0.2	0.3	-1	-0.3	0.53	12	4.7	0.1	-0.5	-7	0	-0.9	-30	-0.4	-0.4	-0.035	0.55	0.8	-3	33	0.1	0.12	5.1	0.1	5	9.2	2.2	7	-0.3	13	9	7	21	15	1	0	1528	-1.2	0.75	-2	0.36	0.54
1	2.88	2.15	0.32	0.18	0.23	0	10.5	-13.5	-0.4	3.6	-0.2	0.64	24	5.4	-2.6	0.3	12	-2.4	-11.1	-17	-0.6	0.5	-0.026	0.54	0.7	-1	195	-0.3	0.1	-2.5	-2.3	-0.2	2.3	1.4	0.9	0	-82	-57	-11	41	-31	1	-1	916	-0.9	-0.06	-3	1.27	0.67
1	1.04	1.63	-0.31	0.02	-0.28	-0.02	17.7	-11.1	-0.6	-5.7	-0.3	-0.02	1	-1.1	-2.6	0.2	11	-0.3	-2.1	-12	-0.5	-0.1	-0.018	0.07	0.7	0	18	0.2	0.12	0	-0.6	0.6	0.6	0.6	0	0	2	0	0	4	-22	-2	0	-45	-1.8	0.25	-5	-0.21	-0.32
1	0.78	0.32	0.65	-0.01	-0.18	0	-1	5.4	-1.2	-3.3	0.1	0.09	3	0.7	-0.2	0.2	2	0.2	-0.6	-141	0.6	0.3	-0.109	0.26	-0.1	4	62	0	0.15	2	-0.1	2.1	0.8	0.8	0	0	1	0	1	-8	-23	-2	0	1282	-2	-0.06	-8	0.33	0.23
1	-1.02	-0.53	-0.38	-0.08	-0.02	-0.01	0.6	-0.3	-0.4	0.1	0	0	-2	0.3	0.6	-0.4	-7	-0.5	-1.1	40	-0.1	0.1	0.031	0.7	-1.3	-4	-18	-0.2	0.02	2.5	0	2.5	0.4	-0.5	0.9	-0.1	3	0	2	1	-10	-2	-1	1026	0.4	-0.19	-3	-0.42	-0.4
1	0.48	0.74	-0.33	0.02	0.05	0	6.6	-6.8	-0.2	0.6	-0.2	-0.29	-8	-2.6	0.1	0	1	-0.9	-3.7	104	-1.1	-0.3	0.077	0.75	-1.3	-11	-15	0.1	0.15	-0.6	0.2	-0.8	2	-2.7	4.7	-0.4	-11	-5	0	9	-45	-2	0	-818	-2.6	0.27	3	0.43	0.14
1	1.03	0.96	0.19	-0.07	-0.05	0	4.8	-1.8	-1.4	-1.6	0	-0.3	-3	-0.8	4.2	1.3	0	-1.3	-2	2	-0.4	-0.1	-0.004	0.45	0.7	4	31	-0.5	0.07	1.5	-0.3	1.8	-3	-2	-1	0	3	-1	0	-13	-25	-3	0	377	-1.6	-0.29	-3	0.12	-0.05
1	-0.76	-0.43	-0.35	0.04	-0.02	0	-0.4	-2.1	2.2	0.1	0.2	-0.01	1	0	0.1	0.2	2	0.4	0.3	16	-0.6	0.1	0.003	0.05	-0.8	-2	-2	0.2	0.07	-3	-0.2	-2.8	1.4	2.3	-0.9	0.1	7	7	1	2	5	0	0	710	-3.7	-0.24	-2	0.18	0.23
1	0.31	0.08	0.16	0.07	0	0	-1.3	0.6	0.9	0	-0.2	0.05	5	1.3	2	0.8	1	-1	-2.4	5	-0.3	-0.1	-0.002	0.33	2.1	-1	35	0.1	0.1	1.2	-0.5	1.7	0.1	-1.1	1.2	-0.2	-2	1	3	13	-23	-1	-1	1422	-0.4	-0.11	-3	0.37	-0.08
1	0.63	-0.13	0.7	0.08	-0.01	-0.01	-9.6	10.2	0.6	-1	-0.2	0.37	16	5	3.6	1.1	-1	0.2	1.3	13	0.2	0.6	0.014	0.5	-1.3	-7	-66	-0.1	0.08	0.3	0.6	-0.3	2.5	0	2.5	-0.2	6	5	18	3	-4	-2	1	27	-0.8	0.3	-1	-0.22	0.09
1	1.2	0.17	0.64	0.35	0.02	0.02	-8.2	5.1	3.6	-0.6	0.1	-0.21	-4	-0.4	3.4	0.3	-8	-0.2	-0.2	-4	-0.2	-0.3	-0.009	-0.02	0.8	4	50	-0.1	0.1	1.7	0.6	1.1	-2.5	-4	1.5	-0.4	0	-1	9	9	-5	-3	1	829	-1.1	1.98	-3	0.24	-0.85
1	0.67	0.61	0.09	-0.02	-0.01	0	3.5	-1.9	-1.1	-0.3	-0.2	0.35	12	3.2	0.3	0.4	3	-0.2	-0.4	4	-0.2	0.2	0.001	0.33	-4.1	-4	63	0	0.14	6.9	0.8	6.1	7.5	3.1	4.4	-0.2	-46	-51	7	-17	-74	-3	-1	1885	-53.8	-0.32	-2	0.78	0.03
1	-2.18	-1.91	-0.02	-0.25	0	0	-6.8	7.7	-1.4	0.5	0	-0.02	1	0.2	1	0.3	-1	0.1	-0.5	-13	-0.1	-0.2	-0.013	0.76	-0.6	-5	2	0	0.04	-2.1	1.1	-3.2	2.2	4.3	-2.1	0.3	4	2	2	0	-6	-1	0	399	0.5	0.04	-3	-0.29	-0.14
1	1.07	0.65	0.38	0.03	0	0.01	0.2	0.7	-0.8	-0.2	0.1	0.24	7	2.2	0.1	0.1	1	-0.2	-1.7	34	-0.1	-0.2	0.027	-0.42	-0.4	-3	48	0	0.05	0.3	-0.3	0.6	1.4	1.3	0.1	0	3	-1	31	19	-17	-2	5	257	1.1	0.03	-4	-0.58	-0.52
1	-1.41	-1.54	0.22	-0.04	-0.03	-0.02	-6.5	6.1	0.7	-0.2	-0.1	-0.13	0	-0.3	2.3	1.1	4	-0.2	0.3	1	0.1	-0.2	0.004	1.51	0.2	-2	17	-0.2	0	0.5	0.5	0	2.2	0.2	2	-0.2	-7	-5	1	10	-30	-2	0	758	-14.6	5.12	-2	0.37	0.15
2	-0.39	-0.81	0.33	-0.02	0.1	0.01	-8.5	6.9	0	1.5	0.1	0	1	1.1	2.7	0.2	-8	-0.6	-1.3	-8	-0.5	0.1	-0.025	0.44	-0.8	-4	-4	0	0.07	-0.1	-0.4	0.3	6.4	0.6	5.8	-0.3	16	10	8	0	2	0	0	2743	-0.5	0.25	-4	1.18	0.88
2	1.31	0.99	0.18	0.02	0.11	0.01	2.4	-2.6	-0.5	0.7	0	-1.03	-32	-8.3	1.9	-0.5	-13	-0.2	-0.8	159	-0.7	-0.6	0.142	0.07	-0.2	0	-206	0.3	0.11	-3.7	-0.4	-3.3	-0.9	-2.3	1.4	-0.2	0	1	-8	-45	-31	-2	-1	-2563	-0.9	0.24	-2	-0.11	-0.9
2	2.21	2.25	-0.1	0.1	-0.02	-0.02	17.8	-14.1	-1	-2	-0.7	0.3	9	2.7	0	0	1	0.2	-0.6	6	0.3	0.2	0.011	0.42	3.6	5	-7	-0.2	-0.02	-1.1	-1.8	0.7	-0.6	-0.9	0.3	-0.1	-37	-29	-30	-5	-56	-6	-1	-678	-3.2	0.31	-4	-0.43	-0.28
2	-2.73	-2.29	-0.27	-0.17	-0.01	0.01	-10	7.1	0	2.5	0.4	0.04	2	0.8	1.2	0.3	0	-0.1	-0.9	13	-0.7	-0.1	0	0.26	-0.6	-4	19	-0.1	0.05	-1.2	-0.7	-0.5	0.1	-0.2	0.3	-0.1	-1	-1	0	0	-55	-2	0	151	1	0.17	-2	-0.12	-0.05
2	0.54	-0.43	1.04	-0.01	-0.07	0.01	-9.6	11.3	-0.7	-1.1	0.1	-0.09	0	-0.2	1.2	0.5	2	-0.1	0.3	26	-0.4	-0.1	0.016	-6.93	0.6	14	150	0.2	0.12	1.1	-0.6	1.7	1.9	-0.1	2	-0.1	3	3	-5	-18	-47	-6	1	791	-6.1	-0.11	2	-0.5	-1.38
2	1.97	0.74	1.03	0.18	0.03	-0.01	-3.5	2.4	1.3	0.1	-0.3	1.06	16	4	-17.9	-5.3	6	-2.2	-17.8	2	0.7	-0.4	0.011	-1.31	0.2	0	82	0	0.01	0.9	0.4	0.5	2.5	-1.8	4.3	-0.5	-13	-14	-3	9	-58	-3	0	1149	0.4	0.96	0	0.21	-0.15
2	3.51	2.62	0.68	0.19	0	0.02	4	-3.5	-0.5	-0.1	0.1	0.05	-18	-4.6	-12.1	-4.8	-11	2.2	0.5	117	-0.6	0	0.117	0.53	1.5	-2	12	-0.3	-0.05	-2.1	-0.8	-1.3	-0.7	-0.8	0.1	0	-5	-5	-15	6	-46	-2	0	269	-18.3	0.01	-1	-0.34	-0.49
2	1.17	1.41	-0.21	-0.1	0.06	0.01	9.3	-6.9	-3.5	1	0.1	0.17	4	1.7	0.3	-0.3	-5	0	0	24	0.1	0.2	0.023	1.64	-1.6	-8	-41	-0.5	-0.1	-2.8	-1.3	-1.5	2	2.2	-0.2	0.1	7	0	0	-3	-3	-2	0	-56	-2.9	-0.07	-4	0.38	-0.18
2	0.66	0.27	0.47	-0.01	-0.07	0	-2.1	4.5	-1	-1.4	0	-0.53	-13	-3.7	2.9	0.8	-2	0.1	1.7	75	-1.1	-0.5	0.037	1.11	0.7	-23	-50	-0.1	-0.02	-10.7	-2.1	-8.6	-2.9	-2	-0.9	0	10	4	3	13	-7	0	0	243	3.1	1.26	1	0.12	-0.31
2	-0.44	0.13	-0.47	-0.06	-0.02	-0.02	4.8	-4.1	-0.3	-0.3	-0.1	0.19	1	0.2	-4	-1.2	1	-0.7	-5.5	40	-0.4	-0.3	0.032	0.67	0.7	2	26	-0.4	0.04	1.6	-0.2	1.8	3.5	1.1	2.4	-0.2	0	2	1	-5	-12	-2	1	921	-0.3	0.26	-3	0.36	-0.07
2	0.2	0.98	-0.7	0.03	-0.09	-0.02	14.7	-13.3	0.3	-1.5	-0.2	0.24	4	2.5	0.5	-0.6	-8	-0.2	-0.4	2	1.3	0.5	0.034	1.63	4.6	-5	52	-0.1	-0.01	-0.3	0	-0.3	4.3	1.8	2.5	-0.1	5	0	8	23	0	-1	0	778	0.2	0.13	-3	-0.29	-0.46
2	0.82	1.35	-0.64	0.02	0.07	0.02	9.4	-9.7	-0.4	0.6	0.1	-0.06	-1	-0.3	1	0.1	-2	-0.3	-0.9	8	-0.3	0	0.002	0.1	1.4	12	-29	0.8	0.12	-0.6	-0.6	0	-4.4	-3.3	-1.1	0	-26	-17	-2	-2	-64	-2	0	124	-2.4	0.07	-6	1.04	0.32
2	0.19	-0.12	0.26	-0.01	0.06	0	-5.6	4.8	-0.5	1.3	0	0.19	4	2.3	1.4	-0.3	-8	0.3	1.3	20	-0.2	-0.1	0.014	-2.3	-1.2	1	24	-0.3	0	0.2	1.1	-0.9	0.4	1.1	-0.7	0.1	-1	2	0	-5	-11	-5	0	-608	-1.6	0.13	-5	-0.24	-0.27
[truncated: 17 more columns]
